# Supplementary material for: Assessment of BMP7, SMAD4, and CDH1 Expression Profile and Regulatory miRNA-542-3p in Eutopic and Ectopic Endometrium of Women with Endometriosis
Source: MDPI journal article supplement (doi:10.3390/ijms24076637), 2023-04-02
Supplement: s1 [file s1]

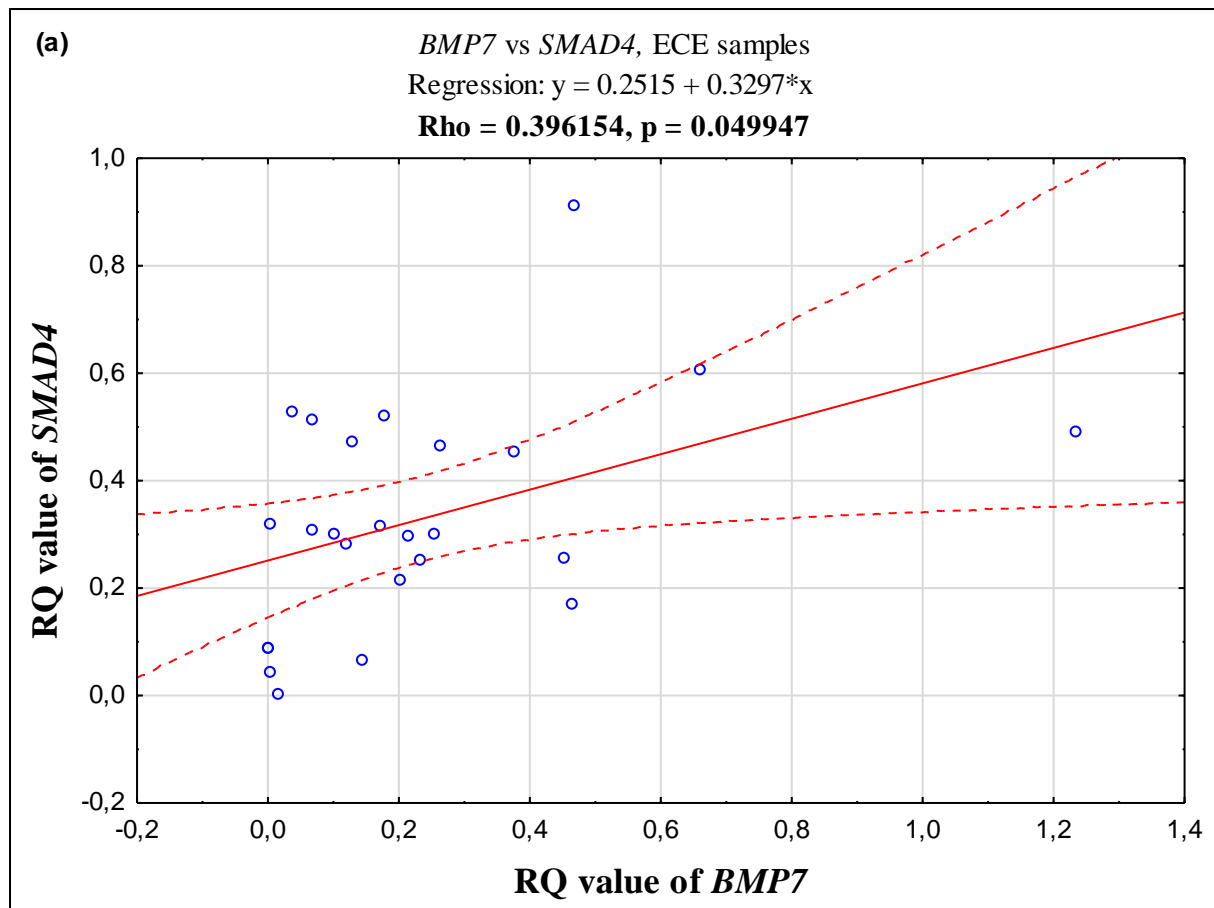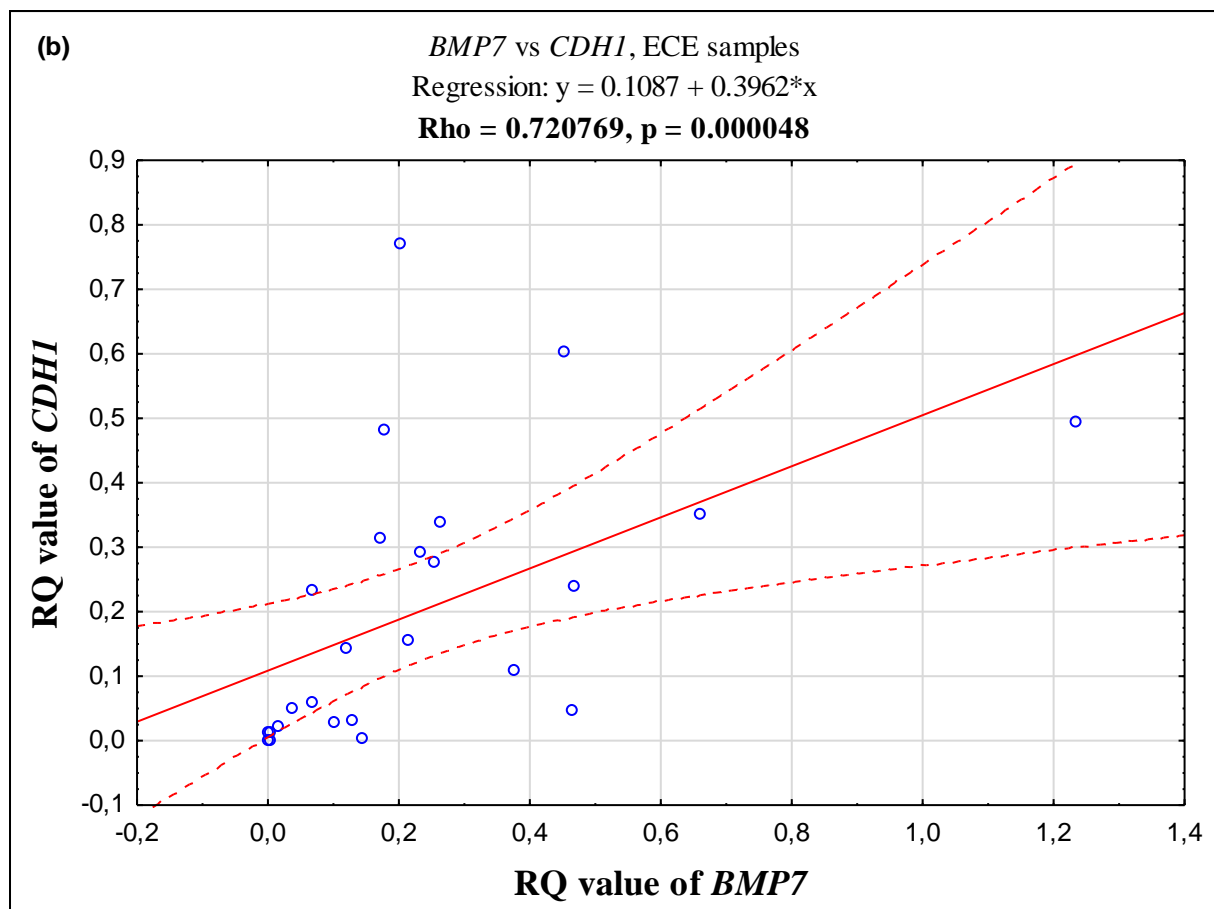

(c)

*SMAD4* vs *CDH1*, ECE samples

Regression:  $y = 0.1129 + 0.2709 \cdot x$

**Rho = 0.458462, p = 0.021170**

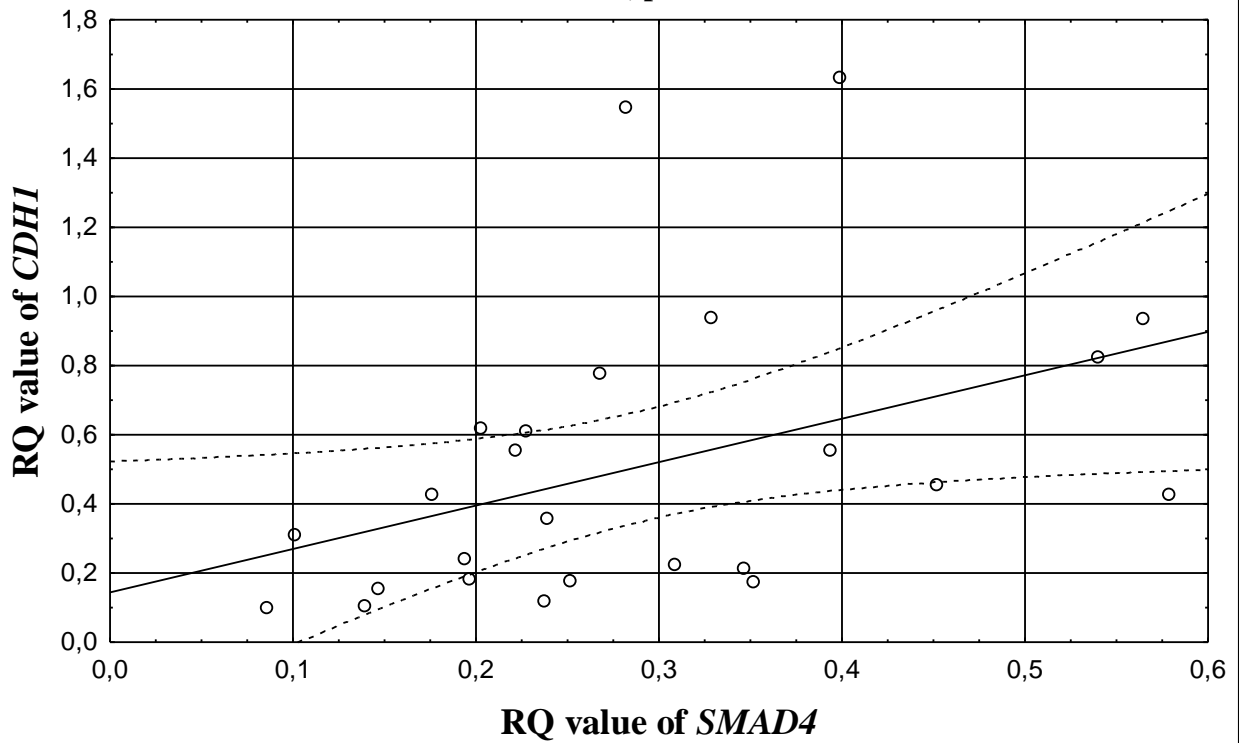

(d)

*SMAD4* vs *CDH1*, EUE samples

Regression:  $y = 0.2205 + 1.601 \cdot x$

**Rho = 0.681538, p = 0.000176**

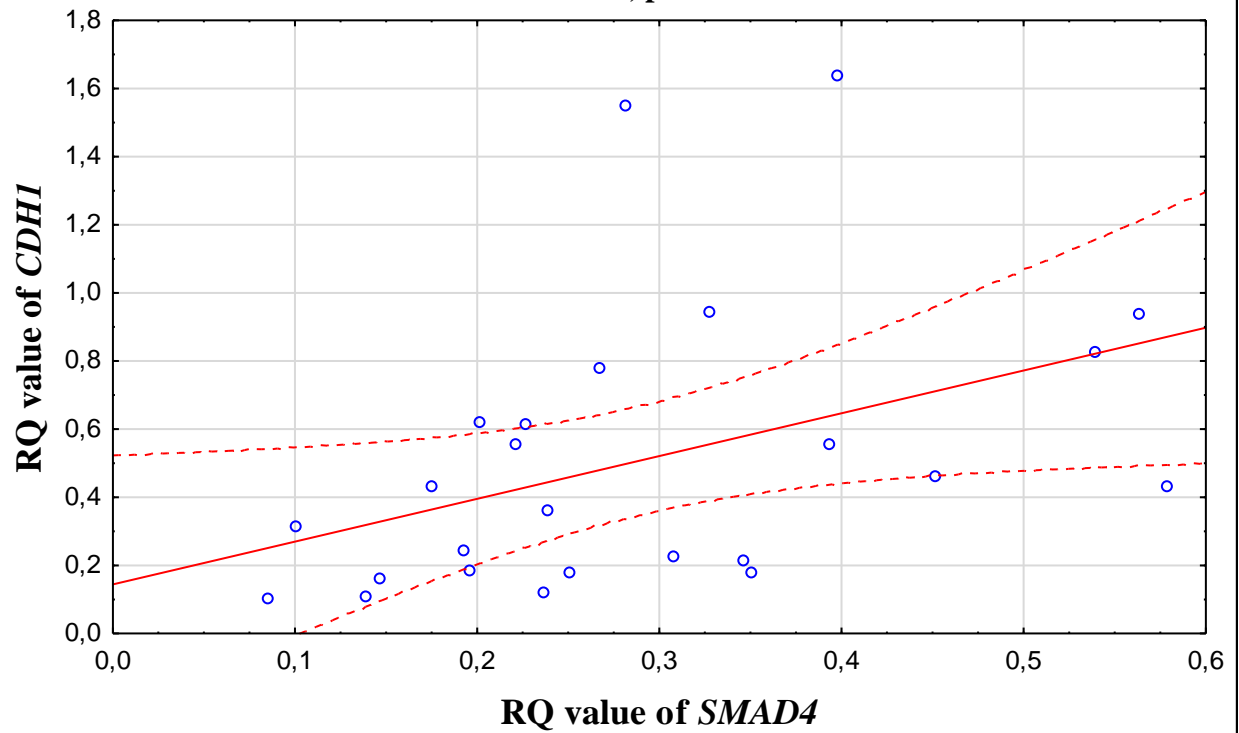

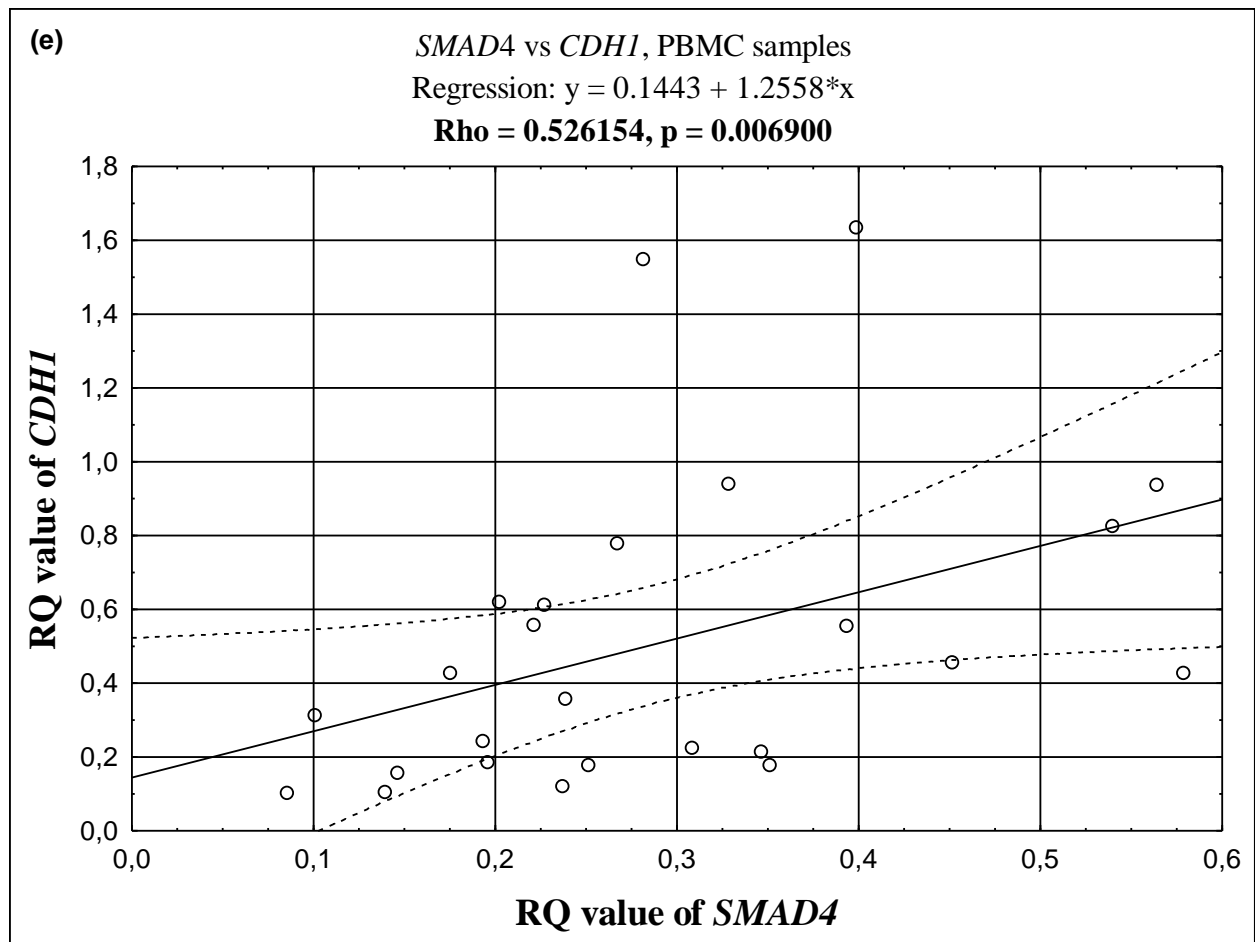

Supplementary Figure S1. The scatter plots showing correlations between expression levels (RQ values) of genes: (a), (b), (c) in ECE, (d) in EUE and (e) in PBMC samples.  $p < 0.05$ ; Spearman's rank correlation.
